# Supplementary material for: Reassessment of MxiH subunit orientation and fold within native Shigella T3SS needles using surface labelling and solid-state NMR
Source: PubMed Central journal article supplement (PMC4658334; doi:10.1016/j.jsb.2015.10.005), 2015-12
Supplement: mmc1.pdf [file mmc1.pdf]

## SUPPLEMENTARY MATERIAL FOR

### **Reassessment of MxiH subunit orientation and fold within native *Shigella* T3SS needles using surface labelling and solid-state NMR**

Joeri Verasdonck<sup>a,‡</sup>, Da-Kang Shen<sup>b,‡</sup>, Alexander Treadgold<sup>b,‡</sup>, Christopher Arthur<sup>c</sup>,  
Anja Böckmann<sup>d,\*</sup>, Beat H. Meier<sup>a,\*</sup> and Ariel J. Blocker<sup>e,\*</sup>

<sup>a</sup>Physical Chemistry, ETH Zurich, 8093 Zurich, Switzerland.

<sup>b</sup>School of Cellular & Molecular Medicine, University of Bristol, BS8 1TD, Bristol, United Kingdom.

<sup>c</sup>School of Chemistry, University of Bristol, BS8 1TS, Bristol, United Kingdom.

<sup>d</sup>Institut de Biologie et Chimie des Protéines, Bases Moléculaires et Structurales des Systèmes Infectieux, Labex Ecofect, UMR 5086 CNRS, Université de Lyon, Lyon, France.

<sup>e</sup>Schools of Cellular & Molecular Medicine and Biochemistry, University of Bristol, BS8 1TD, Bristol, United Kingdom.

<sup>‡</sup>Joint first authors

\*Corresponding authors: Ariel Blocker, [ariel.blocker@bristol.ac.uk](mailto:ariel.blocker@bristol.ac.uk), tel +441173312063, fax +441173312091, Beat H. Meier, [beme@ethz.ch](mailto:beme@ethz.ch); Anja Böckmann, [a.boeckmann@ibcp.fr](mailto:a.boeckmann@ibcp.fr)

## LIST OF SUPPLEMENTARY ITEMS

Table S1: *Shigella flexneri* strains used in this study

Table S2: Primer sequences used in this study

Table S3: Solid state NMR data collection conditions

Table S4: Assignment table

Figure S1: Location of the amino acids selected for mutagenesis in surface labelling experiments designed to test the differing MxiH models

Figure S2: Electrospray mass spectra of untreated and labelled needles

Figure S3: Sequence alignment showing variation between MxiH in *S. flexneri* serotype 5a and 6

Figure S4: 20-ms DARR spectrum of the natively-grown uniformly-labelled MxiH needles

Figure S5: Representative plane ( $^{13}\text{C}$  59.54 ppm) of NCACB spectrum

Figure S6: 200-ms DARR spectrum

Figure S7: Representative plane (55.17 ppm) of the CCC-spectrum

Figure S8: Direct comparison of chemical shifts between the native needles assigned in this work and the *in vitro* polymerized needles by Demers *et al.* (2013).

**TABLE 1. *Shigella flexneri* strains used in this study**

| Strain                                    | Genotype (strain; plasmid)               | Reference              |
|-------------------------------------------|------------------------------------------|------------------------|
| WT                                        | Wild-type M90T, serotype 5a              | (Sansone et al., 1982) |
| $\Delta$ <i>mxiH</i>                      | SH116                                    | (Blocker et al., 2001) |
| $\Delta$ <i>mxiH mxiH</i>                 | SH116; pACT3 <i>mxiH</i>                 | (Shen et al., 2010)    |
| $\Delta$ <i>mxiH mxiH</i> <sub>L32C</sub> | SH116; pACT3 <i>mxiH</i> <sub>L32C</sub> | This study             |
| $\Delta$ <i>mxiH mxiH</i> <sub>V68C</sub> | SH116; pACT3 <i>mxiH</i> <sub>V68C</sub> | This study             |

**TABLE 2. Primer sequences used in this study\***

| Primer                    | Sequence                                  |
|---------------------------|-------------------------------------------|
| MxiH_NdeI_For             | ATTAC <u>CATATG</u> AGTGTTACAGTACCGAATG   |
| MxiH_HindIII_Rev          | ATGCA <u>AAGCTT</u> TTTATCTGAAGTTTTGAATA  |
| MxiH <sub>L32C</sub> _For | GGTGA <u>ACTAAC</u> ATGTGCACTAGATAAATTAGC |
| MxiH <sub>L32C</sub> _Rev | GCTA <u>ATTTATCT</u> AGTGACATGTTAGTTCACC  |

\*Underlined capital letters represent restriction endonuclease sites generated to facilitate cloning.

**TABLE S3. Solid-state NMR data collection conditions\***

| <b>Experiment</b>    | <b>DARR 20ms</b> | <b>DARR 200ms</b> | <b>NCA</b>       | <b>NCACB</b>     | <b>CCC</b>       |
|----------------------|------------------|-------------------|------------------|------------------|------------------|
| Spectrometer         | 850 MHz          | 850 MHz           | 850 MHz          | 850 MHz          | 850 MHz          |
| Probe                | 1.9 mm Bruker    | 1.9 mm Bruker     | 1.9 mm Bruker    | 1.9 mm Bruker    | 1.9 mm Bruker    |
| MAS / kHz            | 18 kHz           | 18 kHz            | 18 kHz           | 18 kHz           | 18 kHz           |
| Measurement Time     | 1.5d             | 1.5d              | 8h               | 5d               | 6d               |
| Number of Scans      | 24               | 24                | 16               | 16               | 4                |
| Interscan delay / s  | 2.6              | 2.6               | 3                | 2.5              | 2.6              |
| <b>Transfer 1</b>    | <b>HC-CP</b>     | <b>HC-CP</b>      | <b>HN-CP</b>     | <b>HN-CP</b>     | <b>HC-CP</b>     |
| Time / ms            | 0.5              | 0.5               | 1                | 1                | 0.5              |
| Field / kHz          | 50(C)/77(H)      | 50(C)/77(H)       | 50(N)/67.6(H)    | 50(N)/61.5(H)    | 50(C)/78(H)      |
| Shape                | tan(H) D=15 kHz  | tan(H) D=15 kHz   | tan(H) D=27 kHz  | tan(H) D=25 kHz  | tan(H) D=15 kHz  |
| Carrier / ppm        | 63               | 63                | 123              | 121              | 49               |
| <b>Transfer 2</b>    | <b>DARR</b>      | <b>DARR</b>       | <b>N-CA</b>      | <b>N-CA</b>      | <b>DREAM</b>     |
| Time / ms            | 20               | 200               | 6.5              | 6                | 4                |
| Field / kHz          | 18(H)            | 18(H)             | 13.5(N)/4.7(C)   | 13.5(N)/4.7(C)   | 8.7(C)           |
| Shape                | -                | -                 | tan(C) D=1.9 kHz | tan(C) D=1.9 kHz | tan(C) D=3.5 kHz |
| Carrier / ppm        | -                | -                 | 50               | 50               | 52               |
| <b>Transfer 3</b>    | -                | -                 | -                | <b>DREAM</b>     | <b>DARR</b>      |
| Time / ms            | -                | -                 | -                | 4                | 80               |
| Field / kHz          | -                | -                 | -                | 8.7(C)           | 18(H)            |
| Shape                | -                | -                 | -                | tan(C) D=3.5 kHz | -                |
| Carrier / ppm        | -                | -                 | -                | 52               | -                |
| <b>t1 Increments</b> | 2048             | 2048              | 600              | 95               | 220              |
| Sweep width / kHz    | 60               | 60                | 24.4             | 5                | 85               |
| carrier / ppm        | 110              | 110               | 123              | 121              | 50               |
| acq. time / ms       | 17.1             | 17.1              | 12.3             | 9.5              | 6.1              |
| zero-filling points  | 4096             | 4096              | 2048             | 256              | 256              |
| window function      | qsine 3          | qsine 3           | qsine 3          | qsine 2.6        | qsine 2.6        |
| <b>t2 Increments</b> | 3072             | 3072              | 3072             | 110              | 110              |
| Sweep width / kHz    | 100              | 100               | 81.5             | 8.3              | 85               |
| carrier / ppm        | 81.5             | 81.5              | 54               | 50               | 50               |
| acq. time / ms       | 18.8             | 18.8              | 18.8             | 6.6              | 6.1              |
| zero-filling points  | 8192             | 8192              | 8192             | 256              | 256              |
| window function      | qsine 3          | qsine 3           | qsine 3          | qsine 2.6        | qsine 2.6        |
| <b>t3 Increments</b> | -                | -                 | -                | 2560             | 3072             |
| Sweep width / kHz    | -                | -                 | -                | 81.5             | 380              |
| carrier / ppm        | -                | -                 | -                | 50               | 96               |
| acq. time / ms       | -                | -                 | -                | 15.7             | 18.8             |
| zero-filling points  | -                | -                 | -                | 4096             | 4096             |
| window function      | -                | -                 | -                | 2.6              | 2.6              |
| <b>Decoupling</b>    | SPINAL64         | SPINAL64          | SPINAL64         | SPINAL64         | SPINAL64         |
| Field / kHz          | 90               | 90                | 90               | 90               | 90               |

\*The value "D" for the shape refers to the difference between minimum and maximum B<sub>1</sub> frequency



|    |     |   |        |    |       |    |        |    |       |     |        |     |        |     |        |     |        |    |        |
|----|-----|---|--------|----|-------|----|--------|----|-------|-----|--------|-----|--------|-----|--------|-----|--------|----|--------|
| 37 | Leu | N | 123,55 | CA | 56,60 | CO | 178,13 | CB | 42,47 | CD1 | 25,41  | CD2 | 26,59  | CG  | 26,61  |     |        |    |        |
| 38 | Ala | N | 118,85 | CA | 54,02 | CO | 177,35 | CB | 17,48 |     |        |     |        |     |        |     |        |    |        |
| 39 | Lys | N | 110,00 | CA | 55,92 | CO | 177,27 | CB | 34,25 | CD  | 29,42  | CG  | 25,80  |     |        |     |        |    |        |
| 40 | Asn | N |        | CA | 50,35 | CO | 171,45 | CB | 38,37 |     |        |     |        |     |        |     |        |    |        |
| 41 | Pro | N |        | CA | 62,77 | CO | 174,68 | CB | 31,26 | CG  | 27,29  |     |        |     |        |     |        |    |        |
| 42 | Ser | N | 106,99 | CA | 57,10 | CO | 174,83 | CB | 67,26 |     |        |     |        |     |        |     |        |    |        |
| 43 | Asn | N | 126,48 | CA | 51,70 | CO | 172,77 | CB | 39,42 | CG  | 176,80 |     |        |     |        |     |        |    |        |
| 44 | Pro | N | 139,21 | CA | 65,42 | CO | 176,92 | CB | 32,92 | CD  | 51,07  | CG  | 27,47  |     |        |     |        |    |        |
| 45 | Gln | N | 116,22 | CA | 58,22 | CO |        | CB | 26,97 | CG  | 32,14  |     |        |     |        |     |        |    |        |
| 46 | Leu | N | 121,48 | CA | 58,01 | CO | 178,33 | CB | 41,97 | CD1 | 25,37  | CG  | 27,75  |     |        |     |        |    |        |
| 47 | Leu | N | 117,94 | CA | 58,33 | CO |        | CB | 42,02 | CD1 | 24,73  | CD2 | 23,56  | CG  | 26,25  |     |        |    |        |
| 48 | Ala | N | 122,96 | CA | 55,27 | CO | 182,04 | CB | 18,58 |     |        |     |        |     |        |     |        |    |        |
| 49 | Glu | N | 122,29 | CA | 59,12 | CO | 179,10 | CB | 29,20 | CG  | 36,65  |     |        |     |        |     |        |    |        |
| 50 | Tyr | N | 119,82 | CA | 62,59 | CO | 176,41 | CB | 38,48 |     |        |     |        |     |        |     |        |    |        |
| 51 | Gln | N | 117,04 | CA | 60,19 | CO | 180,76 | CB | 27,25 | CD  | 179,21 | CG  | 32,94  |     |        |     |        |    |        |
| 52 | Ser | N | 116,19 | CA | 63,42 | CO | 175,63 | CB | 62,06 |     |        |     |        |     |        |     |        |    |        |
| 53 | Lys | N | 122,32 | CA | 58,32 | CO | 178,86 | CB | 32,11 | CD  | 27,42  | CE  | 42,82  | CG  | 24,85  |     |        |    |        |
| 54 | Leu | N | 120,69 | CA | 57,80 | CO | 179,48 | CB | 40,87 | CD1 | 21,47  | CD2 | 25,21  | CG  | 26,35  |     |        |    |        |
| 55 | Ser | N | 113,12 | CA | 63,20 | CO | 176,01 | CB | 63,61 |     |        |     |        |     |        |     |        |    |        |
| 56 | Glu | N | 121,94 | CA | 61,46 | CO | 177,50 | CB | 31,31 | CD  | 182,33 | CG  | 39,26  |     |        |     |        |    |        |
| 57 | Tyr | N | 119,18 | CA | 62,68 | CO | 176,95 | CB | 39,26 | CD1 | 132,27 | CD2 | 132,27 | CE1 | 118,17 | CE2 | 118,17 | CG | 130,55 |
| 58 | Thr | N | 111,18 | CA | 66,09 | CO | 176,34 | CB | 68,62 | CG2 | 21,89  |     |        |     |        |     |        |    |        |
| 59 | Leu | N | 123,89 | CA | 57,75 | CO | 178,42 | CB | 40,22 | CD1 | 22,13  | CD2 | 27,97  | CG  | 26,21  |     |        |    |        |
| 60 | Tyr | N | 124,11 | CA | 59,01 | CO | 176,93 | CB | 36,23 | CD1 | 134,27 | CD2 | 134,27 | CE1 | 118,17 | CE2 | 118,17 | CG | 129,50 |
| 61 | Arg | N | 117,52 | CA | 56,61 | CO | 180,50 | CB | 30,94 | CD  | 42,27  | CG  | 25,39  | CZ  | 159,57 |     |        |    |        |
| 62 | Asn | N | 119,31 | CA | 56,96 | CO | 176,07 | CB | 39,92 | CG  | 175,13 |     |        |     |        |     |        |    |        |
| 63 | Ala | N | 123,98 | CA | 56,05 | CO | 180,07 | CB | 17,49 |     |        |     |        |     |        |     |        |    |        |
| 64 | Gln | N | 121,93 | CA | 57,97 | CO | 175,70 | CB | 31,30 | CD  | 178,29 | CG  | 32,91  |     |        |     |        |    |        |
| 65 | Ser | N | 109,93 | CA | 60,58 | CO | 179,38 | CB | 63,50 |     |        |     |        |     |        |     |        |    |        |
| 66 | Asn | N | 117,36 | CA | 55,85 | CO | 177,05 | CB | 37,21 | CG  | 174,02 | ND2 | 109,91 |     |        |     |        |    |        |
| 67 | Thr | N | 116,66 | CA | 68,98 | CO | 174,63 | CB | 68,72 | CG2 | 20,93  |     |        |     |        |     |        |    |        |
| 68 | Val | N | 120,71 | CA | 67,27 | CO | 176,52 | CB | 32,13 | CG1 | 22,54  | CG2 | 20,81  |     |        |     |        |    |        |
| 69 | Lys | N | 118,84 | CA | 58,40 | CO | 177,10 | CB | 32,56 | CD  | 28,02  | CE  | 42,44  | CG  | 25,42  |     |        |    |        |
| 70 | Val | N | 118,72 | CA | 66,90 | CO | 179,72 | CB | 31,87 | CG1 | 24,11  | CG2 | 22,16  |     |        |     |        |    |        |
| 71 | Ile | N | 117,95 | CA | 61,52 | CO | 177,62 | CB | 34,30 | CD1 | 7,68   | CG1 | 26,85  | CG2 | 17,64  |     |        |    |        |
| 72 | Lys | N | 123,67 | CA | 61,33 | CO | 178,42 | CB | 30,67 | CD  | 29,38  | CE  | 42,04  | CG  | 24,88  |     |        |    |        |
| 73 | Asp | N | 118,85 | CA | 57,46 | CO | 180,73 | CB | 39,34 | CG  | 179,25 |     |        |     |        |     |        |    |        |
| 74 | Val | N | 124,71 | CA | 66,32 | CO | 176,78 | CB | 31,82 | CG1 | 25,07  | CG2 | 21,48  |     |        |     |        |    |        |
| 75 | Asp | N | 119,57 | CA | 55,20 | CO | 177,22 | CB | 38,00 | CG  | 172,18 |     |        |     |        |     |        |    |        |
| 76 | Ala | N | 121,28 | CA | 54,73 | CO | 180,00 | CB | 18,11 |     |        |     |        |     |        |     |        |    |        |
| 77 | Ala | N | 121,29 | CA | 54,71 | CO | 180,01 | CB | 18,07 |     |        |     |        |     |        |     |        |    |        |

|    |     |   |        |    |       |    |        |    |       |     |        |     |        |     |        |     |        |    |        |
|----|-----|---|--------|----|-------|----|--------|----|-------|-----|--------|-----|--------|-----|--------|-----|--------|----|--------|
| 78 | Ile | N | 119,97 | CA | 64,99 | CO | 178,33 | CB | 38,22 | CD1 | 15,26  | CG1 | 28,13  | CG2 | 18,48  |     |        |    |        |
| 79 | Ile | N | 116,82 | CA | 63,44 | CO | 180,00 | CB | 38,02 | CD1 | 15,11  | CG1 | 31,57  | CG2 | 17,15  |     |        |    |        |
| 80 | Gln | N | 119,84 | CA | 57,93 | CO | 177,09 | CB | 28,19 | CD  | 180,68 | CG  | 33,52  |     |        |     |        |    |        |
| 81 | Asn | N | 115,31 | CA | 52,60 | CO | 175,98 | CB | 37,74 | CG  | 175,38 |     |        |     |        |     |        |    |        |
| 82 | Phe | N | 118,30 | CA | 56,58 | CO | 175,21 | CB | 38,16 | CD1 | 129,35 | CD2 | 129,35 | CE1 | 129,76 | CE2 | 129,76 | CG | 140,28 |
| 83 | Arg | N | 117,27 | CA | 57,13 | CO | 181,45 | CB | 31,79 | CD  | 43,53  | CG  | 27,51  | CZ  | 159,56 |     |        |    |        |

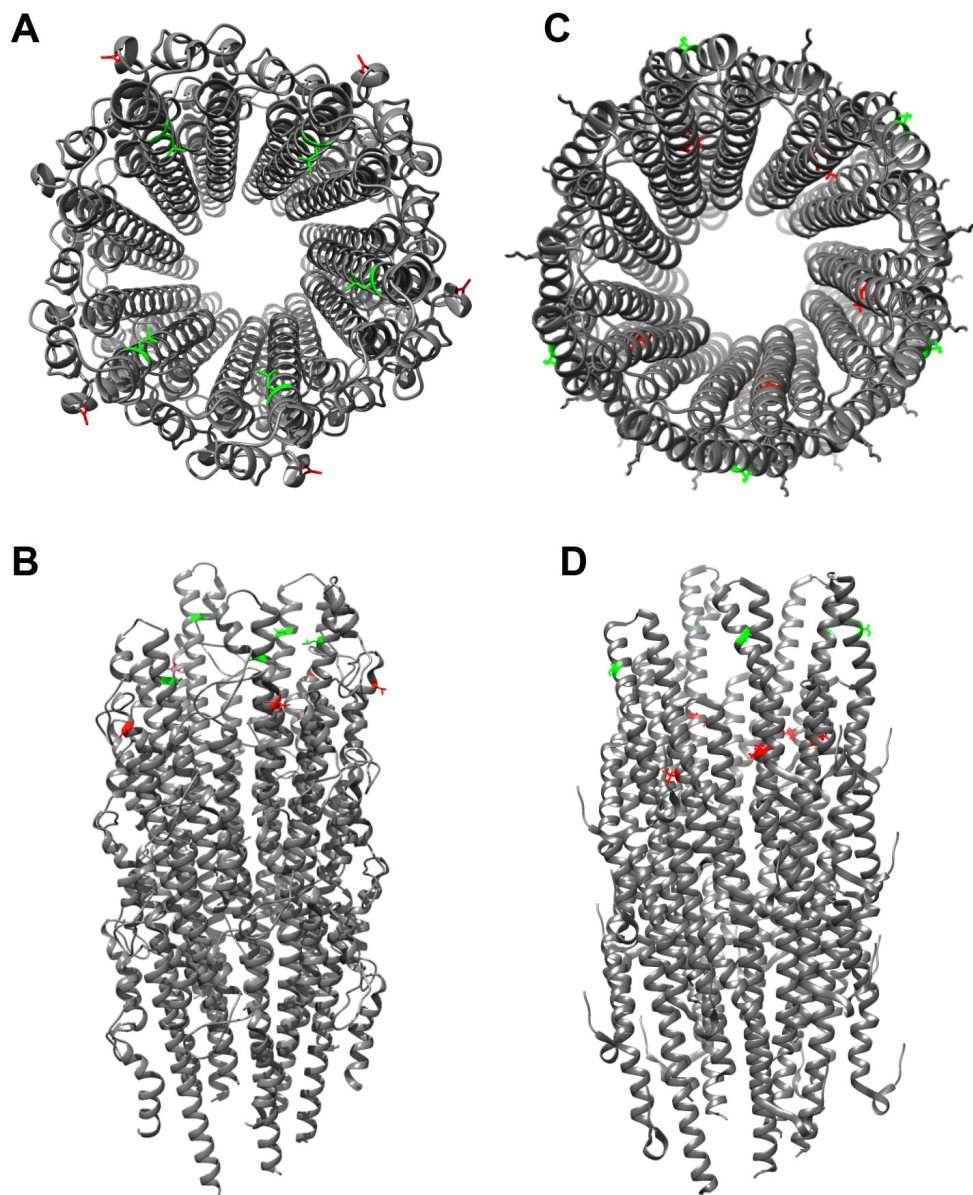

**Figure S1. Location of the amino acids selected for mutagenesis in surface labelling experiments designed to test the differing MxiH models.** A) and B) Top and side view of 22-mer of Fujii *et al.* (2012) model (PDB IB 2J0R), respectively. C) and D) Top and side view of 22-mer of Demers *et al.* (2014) model (PDB IB 2MME), respectively. Amino acids selected for mutagenesis to cysteines are shown as stick models only in the top five MxiH subunits of each model. L32 is in green and V68 in red.



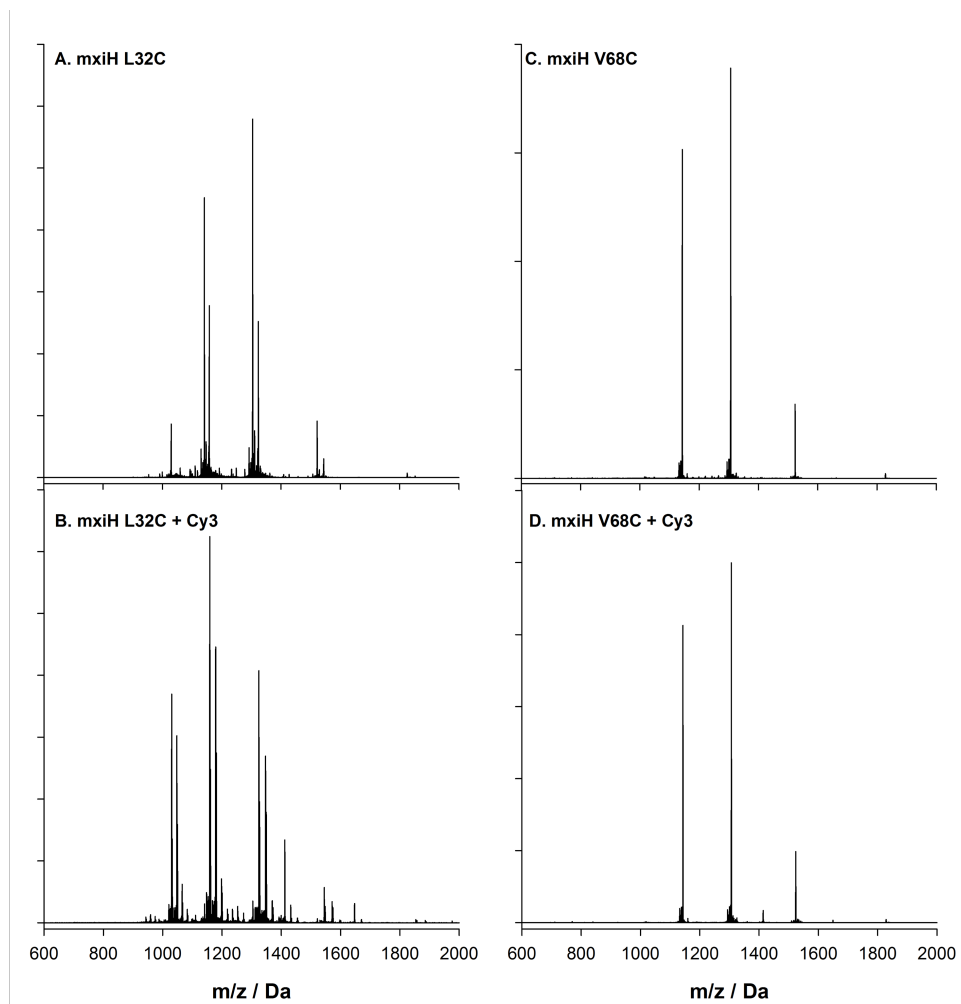

**Figure S2. Electrospray mass spectra of untreated and labelled needles.** Native mass spectrometry analysis of purified needles (A and C) and purified needles labelled with Cy3 maleimide (B and D). Spectra were recorded over mass-to-charge ratio ( $m/z$ ) window of 600-2000.

```

MxiH serotype 5a
MxiH serotype 6

      10      20      30      40      50
MSVTVPNDWW TLSSLSETFD DGTQTLQGE L TLALDKLAKN PSNPQLLAEY
MSVTVPDKDW TLSSLSETFD DGTQTLQGQL TSALNALAEN PSNPQLLAEY
      **          *   *   **   *
      60      70      80
QSKLSEYTLY RNAQSNTVKV IKDVDAAI IQ NFR
QSKLSEYTLY RNAQSNTVKV IKDVDAAI IQ NFR

```

**Figure S3.** Sequence alignment showing variation between MxiH in *S. flexneri* serotypes 5a and 6. Individual sequences are shown using the same colour code as in Fig. 5 and varying amino acids are indicated by red asterisks.

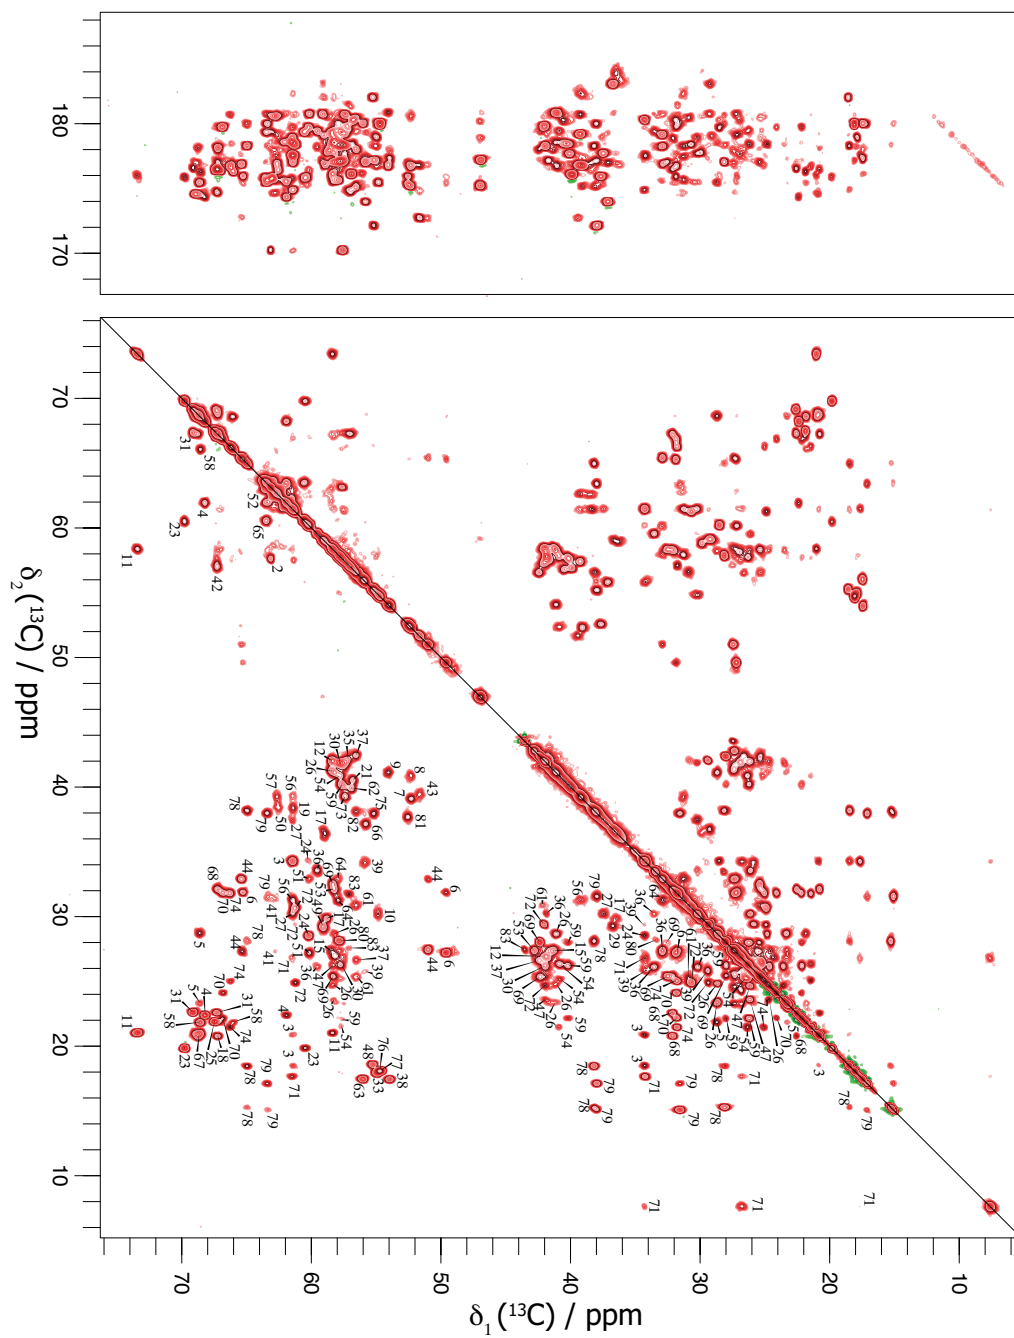

**Figure S4. 20-ms DARR spectrum of the natively-grown uniformly-labelled MxiH needles.** The data has been zero-filled and apodized with a shifted squared sine-bell function. Assigned peaks have been labelled on one side of the diagonal.

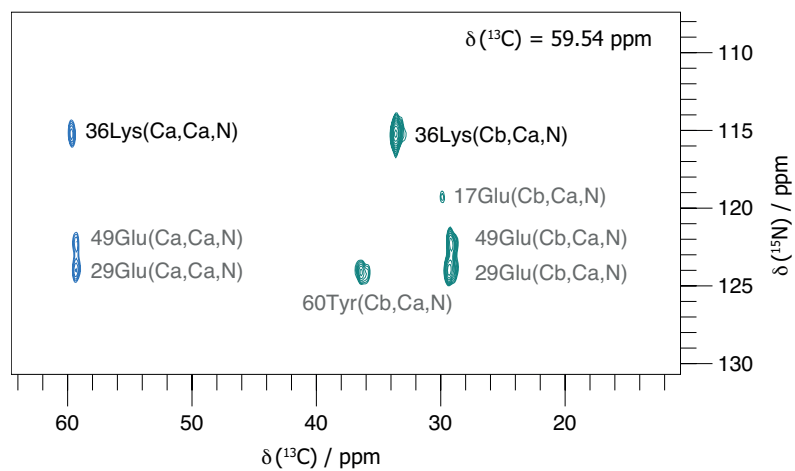

**Figure S5. Representative plane ( $^{13}\text{C}$  59.54 ppm) of NCACB spectrum.** Black labels indicate peaks with their maximum in this plane. Grey labels indicate peaks with their maximum in another plane.

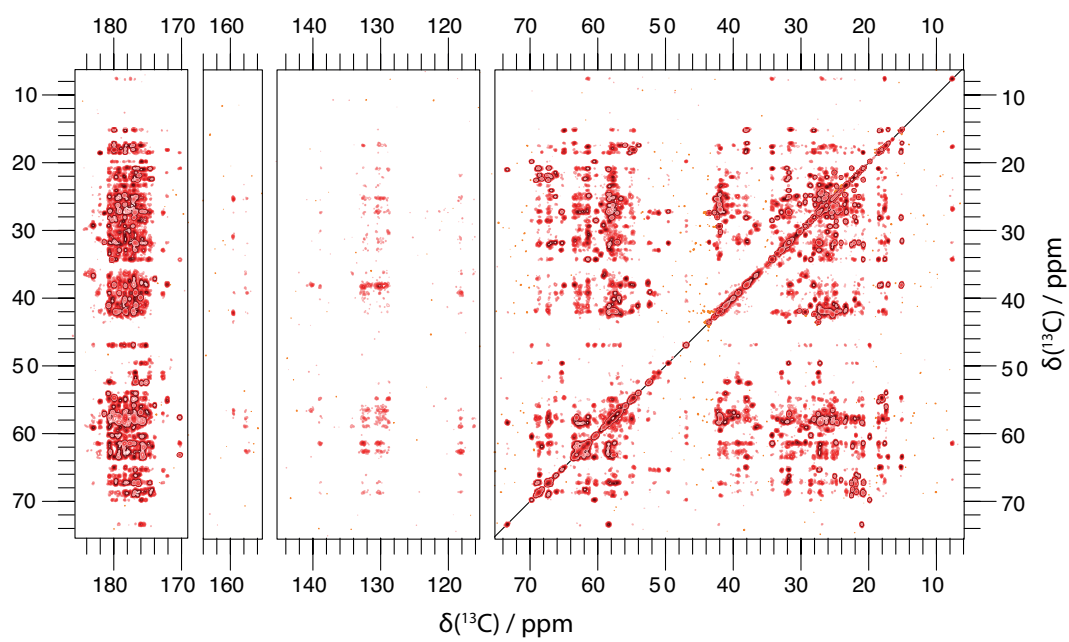

**Figure S6. 200-ms DARR spectrum.** The data has been zero-filled and apodized with a shifted squared sine-bell function.

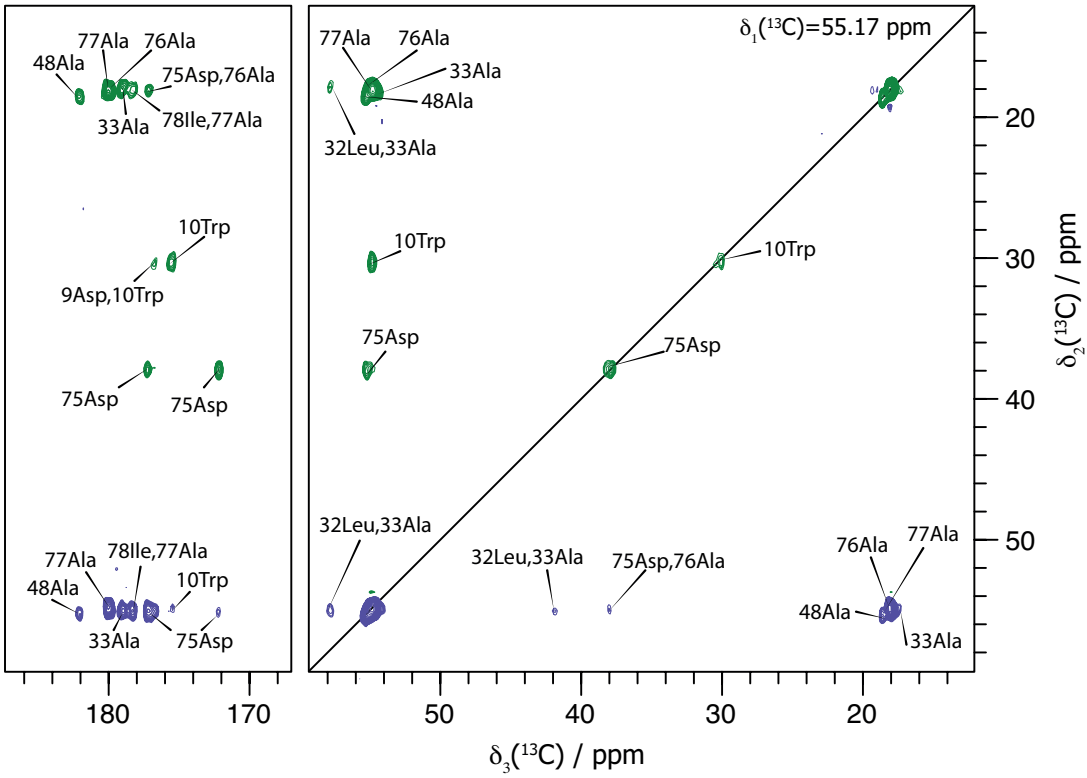

**Figure S7. Representative plane (55.17 ppm) of the CCC-spectrum.** This contains a number of sequential contacts that were used to properly assign serotype-specific mutations. The data has been zero-filled and apodized with a shifted squared sine-bell function.

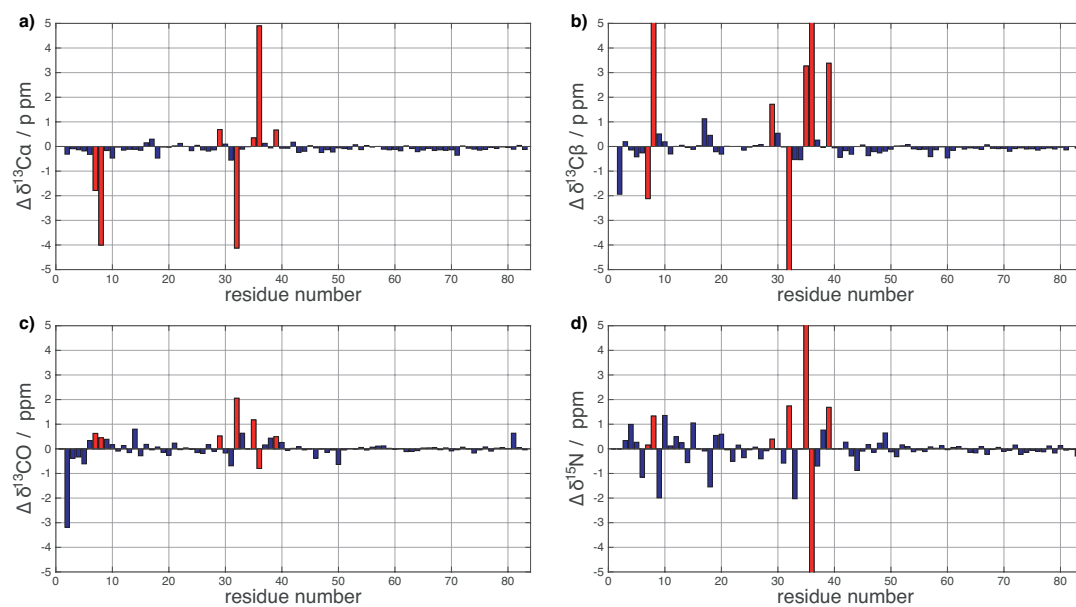

**Figure S8. Direct comparison of chemical shifts between the native needles assigned in this work and the *in vitro* polymerized needles by Demers *et al.* (2013).** Comparisons are made for C $\alpha$  (a) , C $\beta$  (b), CO (c) and N (d). Red bars highlight the serotype differences in the sequence. The rather large deviation of Ser2 can be explained by the presence of non-native Gly and His at the N-terminus in the work of Demers *et al.*
